# Supplementary material for: Distribution and flux of dissolved iron in the peatland-draining rivers and estuaries of Sarawak, Malaysian Borneo
Source: Copernicus journal article supplement (doi:10.5194/bg-17-1805-2020), 2020-04-03
Supplement: Supplementary file 1 [file bg-17-1805-2020-supplement.pdf]

Supplement of Biogeosciences, 17, 1805–1819, 2020  
<https://doi.org/10.5194/bg-17-1805-2020-supplement>  
© Author(s) 2020. This work is distributed under  
the Creative Commons Attribution 4.0 License.

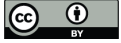

*Supplement of*

## **Distribution and flux of dissolved iron in the peatland-draining rivers and estuaries of Sarawak, Malaysian Borneo**

**Xiaohui Zhang et al.**

*Correspondence to:* Xiaohui Zhang (52163904020@stu.ecnu.edu.cn)

The copyright of individual parts of the supplement might differ from the CC BY 4.0 License.

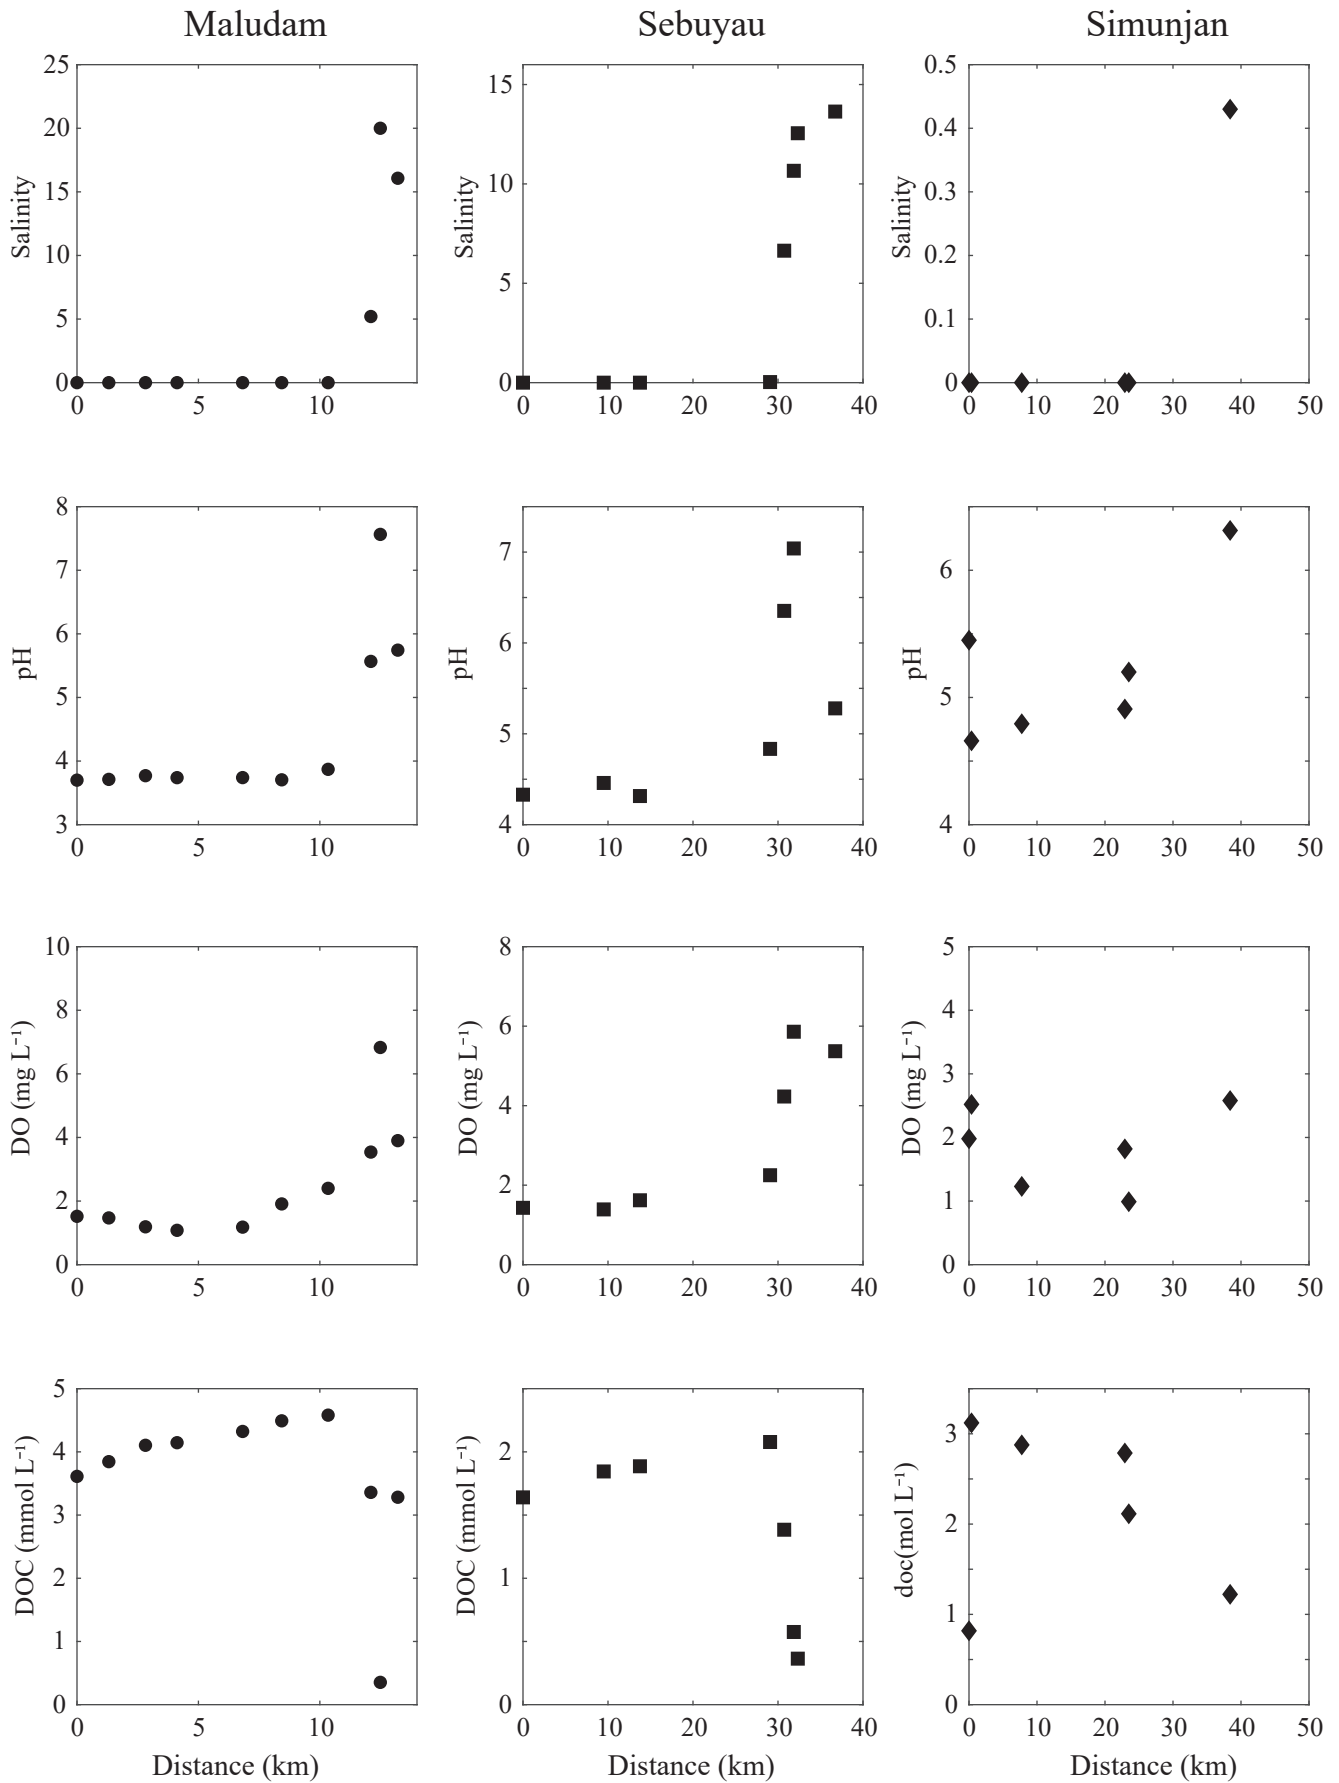

Supplement 1: The distance correlation with S, pH, DO, and DOC in peat-draining rivers with distance downstream including Maludam, Sebuyau, and Simunjan.

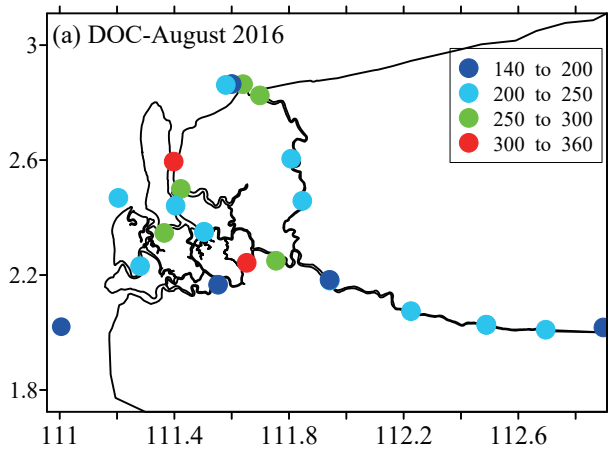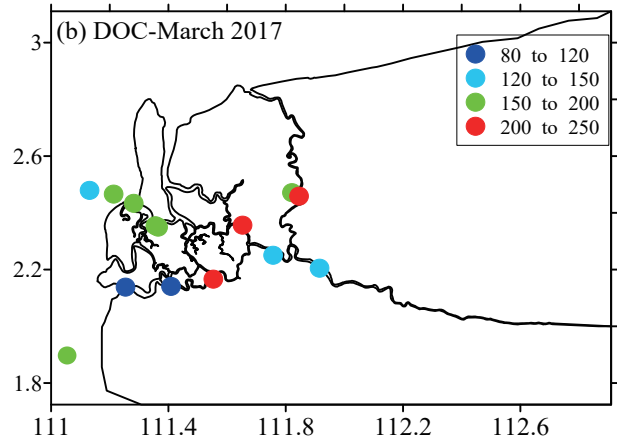

Supplement 2: The DOC concentration in the Rajang River and the Rajang Estuary in the dry season (August 2016) and in the wet season (March 2017)
